# Supplementary material for: Role of DNA Damage Response in Suppressing Malignant Progression of Chronic Myeloid Leukemia and Polycythemia Vera: Impact of Different Oncogenes
Source: MDPI journal article supplement (doi:10.3390/cancers12040903), 2020-04-07

Supplementary Figure 1. Original images of representative western blots in Figure 1b.

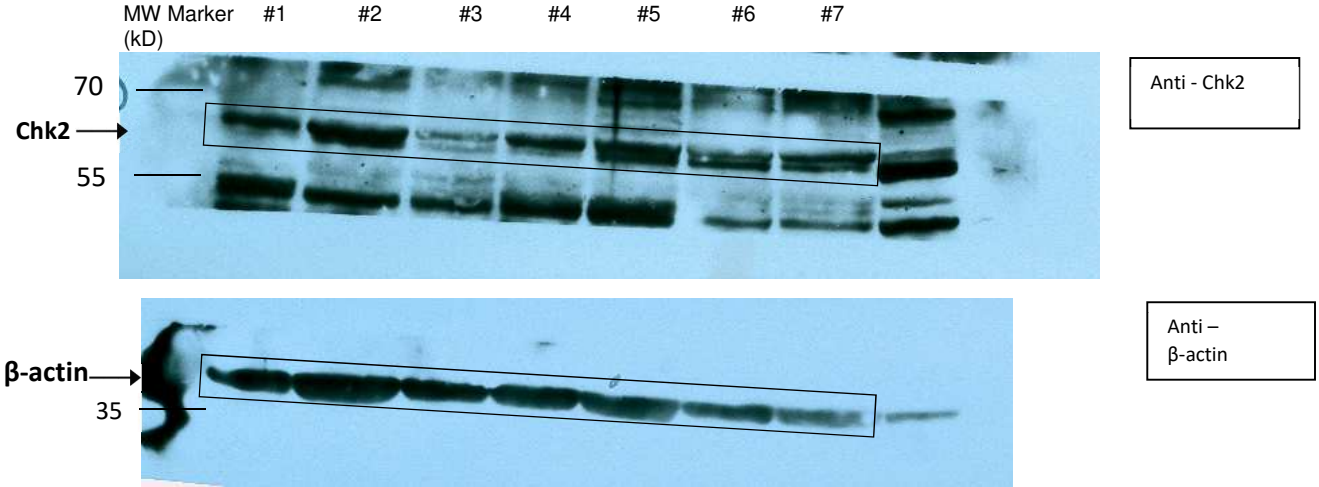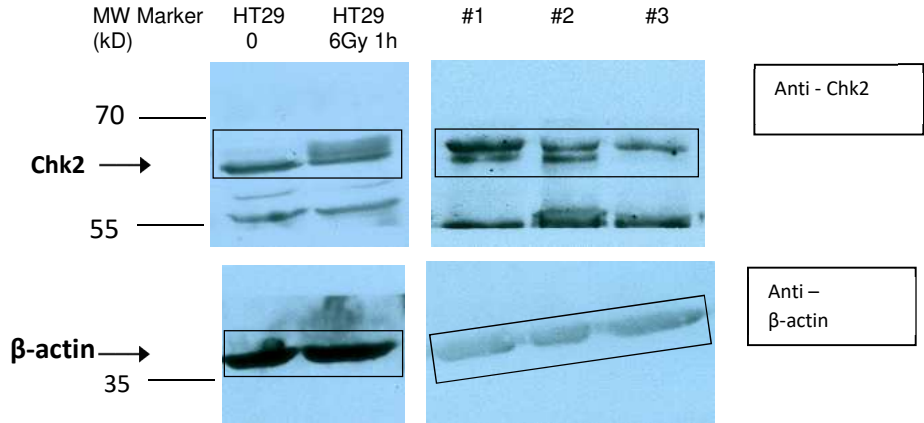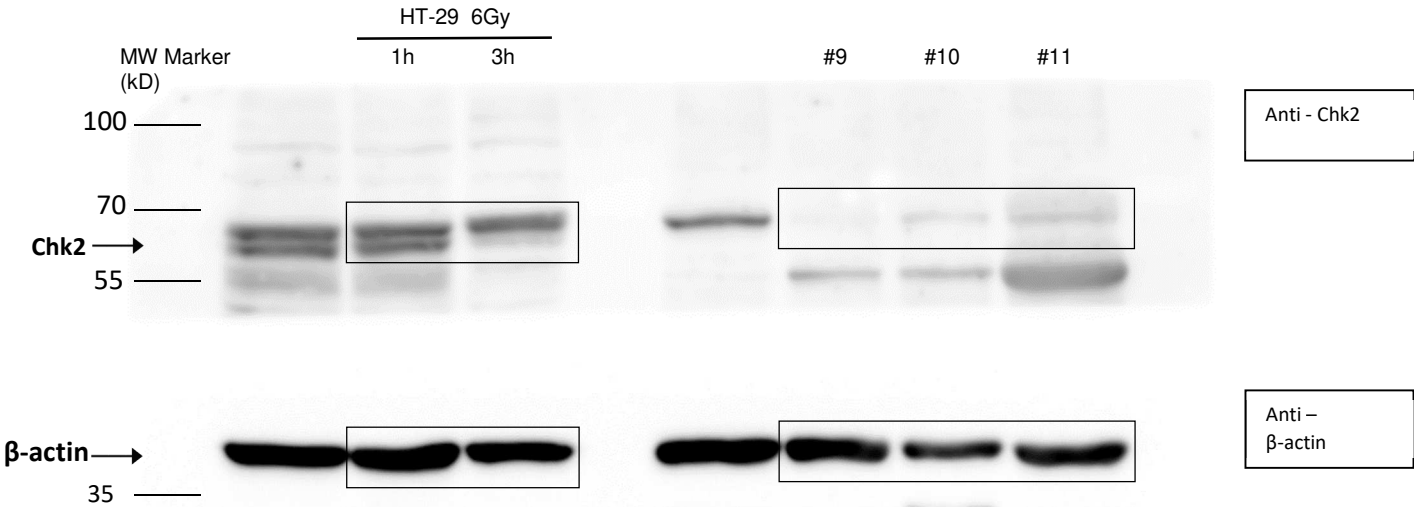

Supplementary Figure 2. Original images of representative western blots in Figure 1c.

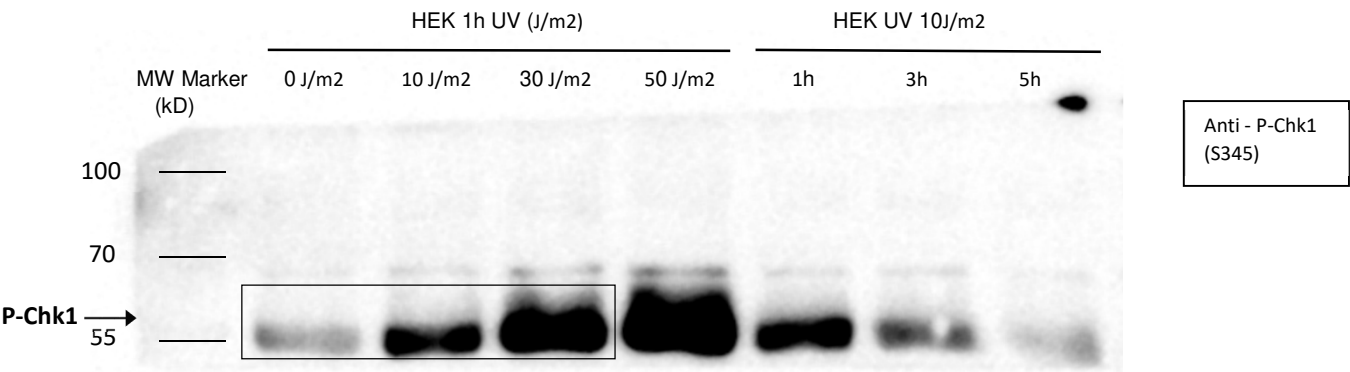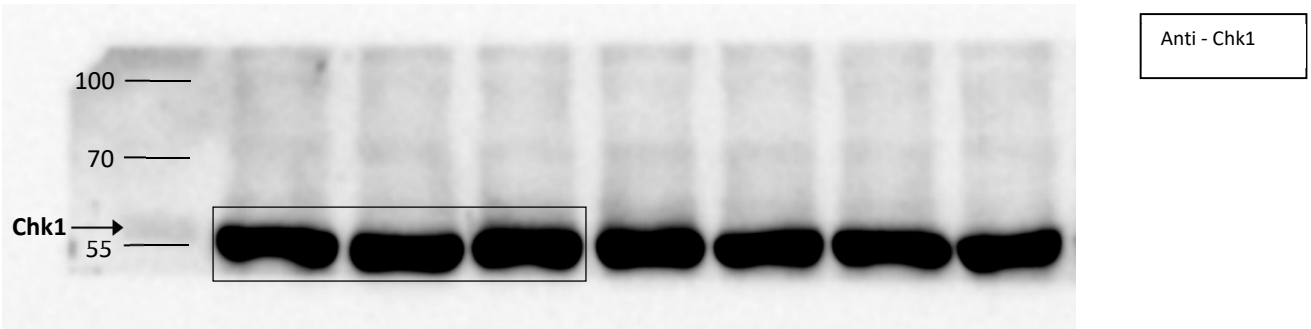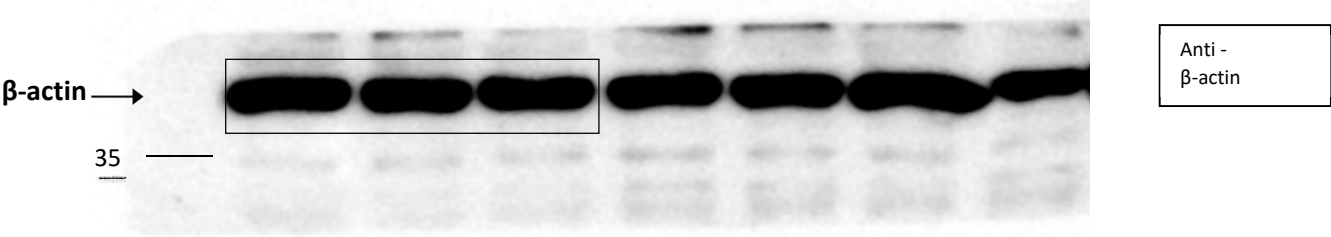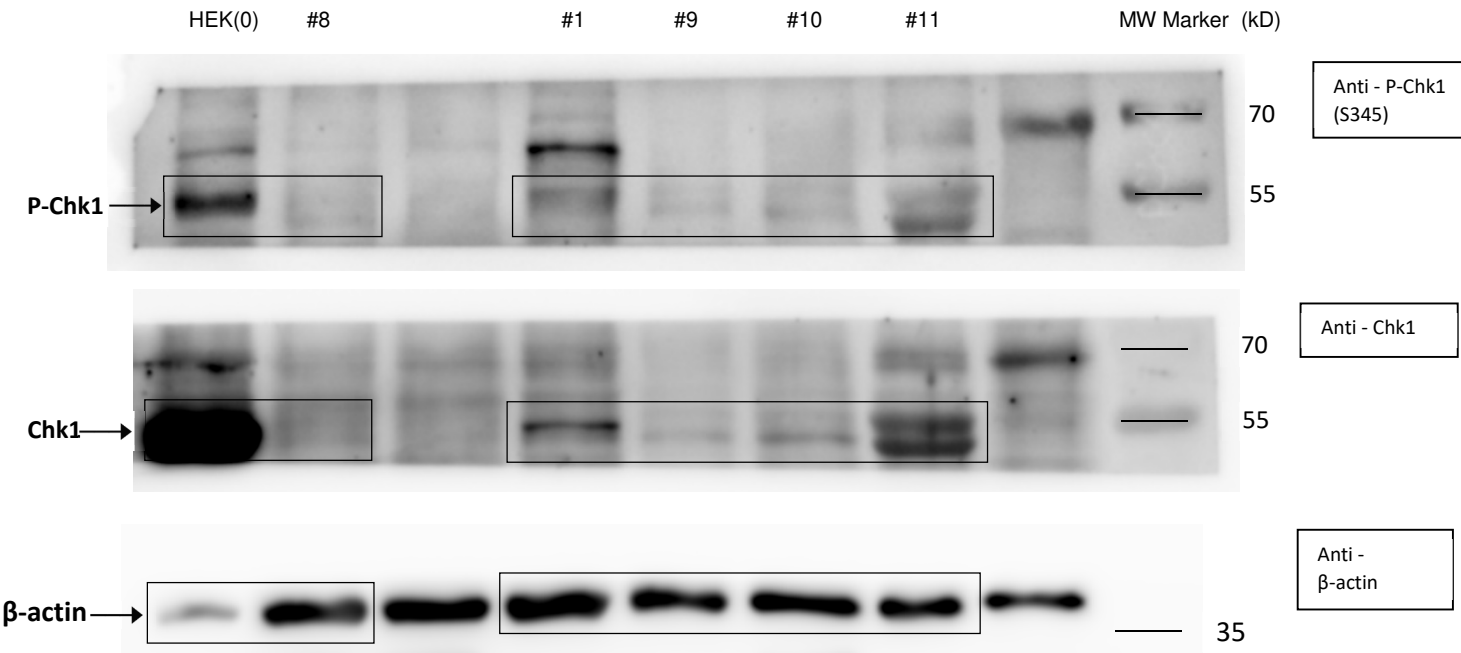

Supplement: s1 [file s1]
